# Supplementary material
Source: MDPI journal article supplement (https://www.mdpi.com/2674-1334/2/2/7)
Supplement: s1 [file s1]

## Supplementary Materials

### Biochemical tests results for PHA-producing bacteria

Table S1: Biochemical tests results for PHA-producing bacteria isolated from Lake Simbi

| Characteristics     | Isolate/Observations |           |          |              |          |          |              |              |           |           |          |           |
|---------------------|----------------------|-----------|----------|--------------|----------|----------|--------------|--------------|-----------|-----------|----------|-----------|
|                     | SO13                 | SO31      | SO75     | SE42         | SE83     | SE84     | SE89         | SE93         | SW32      | SW36      | SW38     | SW62      |
| Colony shape        | Circular             | Circular  | Circular | Circular     | Circular | Circular | Circular     | Circular     | Circular  | Circular  | Circular | Circular  |
| Color               | White                | Off-white | Cream    | Light orange | Orange   | White    | Light orange | Light orange | Yellowish | Off white | Yellow   | Off-white |
| Cell shape          | Rod                  | Rod       | Rod      | Coccus       | Coccus   | Rod      | Coccus       | Coccus       | Rod       | Rod       | Rod      | Rod       |
| Gram reaction       | +                    | +         | +        | -            | +        | +        | -            | +            | +         | -         | +        | +         |
| Catalase            | +                    | +         | +        | +            | +        | +        | +            | +            | +         | +         | +        | +         |
| Oxidase             | +                    | -         | +        | +            | +        | +        | +            | +            | +         | +         | +        | -         |
| H2S production      | +                    | +         | +        | -            | -        | -        | -            | -            | -         | -         | +        | +         |
| Voges Proskauer     | +                    | +         | +        | -            | +        | +        | -            | -            | +         | -         | +        | +         |
| Urease activity     | -                    | -         | -        | +            | -        | +        | +            | +            | -         | -         | -        | -         |
| Indole production   | -                    | -         | -        | -            | -        | +        | -            | -            | -         | -         | -        | -         |
| Citrate utilization | +                    | +         | +        | +            | +        | -        | +            | +            | +         | -         | +        | +         |
| Glucose             | +                    | +         | +        | +            | +        | +        | +            | +            | +         | +         | +        | +         |
| Sucrose             | +                    | +         | +        | +            | +        | +        | +            | +            | +         | +         | +        | +         |
| Xylose              | +                    | +         | +        | +            | -        | +        | +            | +            | +         | -         | +        | +         |
| Lactose             | +                    | +         | +        | +            | -        | +        | +            | +            | +         | +         | +        | +         |
| Starch              | -                    | +         | +        | -            | +        | +        | -            | -            | -         | -         | +        | +         |
| Maltose             | +                    | +         | +        | -            | +        | +        | -            | -            | +         | -         | +        | +         |
| Galactose           | -                    | -         | -        | -            | +        | +        | -            | -            | +         | +         | -        | -         |
| Fructose            | +                    | +         | +        | +            | +        | +        | +            | +            | +         | +         | +        | +         |
| Mannose             | +                    | +         | +        | -            | +        | +        | -            | -            | +         | +         | +        | +         |
| Cellobiose          | +                    | +         | +        | -            | +        | +        | -            | -            | +         | -         | +        | +         |
| Glycerol            | +                    | +         | +        | +            | +        | +        | +            | +            | +         | +         | +        | +         |
| Mannitol            | +                    | +         | +        | +            | -        | +        | +            | +            | -         | -         | +        | +         |

(+ Positive; - Negative)

Table S2: Biochemical tests results for PHA-producing bacteria isolated from Lake Simbi

| Characteristics             | Isolate/Observations |          |          |           |          |          |          |          |          |          |          |
|-----------------------------|----------------------|----------|----------|-----------|----------|----------|----------|----------|----------|----------|----------|
|                             | MO12                 | MO15     | MO22     | MO25      | ME31     | ME32     | ME33     | ME42     | ME51     | ME54     | ME81     |
| Colony shape                | Circular             | Circular | Circular | Circular  | Circular | Circular | Circular | Circular | Circular | Circular | Circular |
| Color                       | Cream                | Cream    | Yellow   | Colorless | Yellow   | White    | Yellow   | Pink     | Yellow   | Yellow   | Cream    |
| Cell shape                  | Rod                  | Rod      | Rod      | Rod       | Rod      | Rod      | Rod      | Rod      | Rod      | Rod      | Rod      |
| Gram reaction               | +                    | +        | +        | -         | -        | +        | +        | -        | +        | +        | +        |
| Catalase                    | +                    | +        | +        | +         | +        | +        | +        | +        | +        | +        | +        |
| Oxidase                     | +                    | +        | +        | +         | +        | +        | +        | +        | +        | +        | +        |
| H <sub>2</sub> S production | -                    | -        | -        | +         | +        | +        | -        | +        | +        | -        | -        |
| Voges Proskauer             | -                    | -        | -        | +         | -        | +        | +        | +        | +        | -        | +        |
| Urease activity             | +                    | +        | -        | -         | +        | -        | -        | -        | -        | -        | +        |
| Indole production           | -                    | -        | -        | -         | -        | -        | -        | -        | -        | -        | -        |
| Citrate utilization         | -                    | -        | +        | -         | -        | +        | +        | -        | +        | +        | +        |
| Glucose                     | +                    | +        | +        | +         | +        | +        | +        | +        | +        | +        | +        |
| Sucrose                     | +                    | +        | +        | +         | +        | +        | +        | +        | +        | +        | +        |
| Xylose                      | +                    | +        | +        | +         | +        | +        | +        | +        | +        | +        | +        |
| Lactose                     | +                    | +        | +        | -         | +        | +        | +        | -        | +        | +        | +        |
| Starch                      | -                    | -        | -        | -         | -        | -        | -        | -        | -        | -        | -        |
| Maltose                     | -                    | -        | +        | +         | +        | +        | +        | +        | +        | +        | +        |
| Galactose                   | +                    | +        | +        | +         | -        | -        | +        | +        | -        | +        | +        |
| Fructose                    | +                    | +        | +        | -         | +        | +        | +        | -        | +        | +        | +        |
| Mannose                     | +                    | -        | -        | +         | +        | +        | +        | +        | +        | -        | -        |
| Cellobiose                  | -                    | -        | +        | +         | +        | +        | +        | +        | +        | +        | +        |
| Glycerol                    | +                    | +        | +        | +         | +        | +        | +        | +        | +        | +        | +        |
| Mannitol                    | +                    | +        | +        | +         | -        | +        | -        | +        | -        | +        | -        |

Table S2. Continued

| Characteristics             | Isolates/Observations |           |              |          |              |          |          |          |
|-----------------------------|-----------------------|-----------|--------------|----------|--------------|----------|----------|----------|
|                             | ME82                  | ME88      | MS42         | MS44     | MS52         | MW27     | MW52     | MW54     |
| Colony shape                | Circular              | Circular  | Circular     | Circular | Circular     | Circular | Circular | Circular |
| Color                       | Light orange          | Off-white | Light orange | Yellow   | Light orange | Yellow   | Cream    | Cream    |
| Cell shape                  | Coccus                | Rod       | Coccus       | Rod      | Rod          | Rod      | Rod      | Rod      |
| Gram reaction               | +                     | +         | +            | +        | +            | +        | +        | +        |
| Catalase                    | +                     | +         | +            | +        | +            | +        | +        | +        |
| Oxidase                     | +                     | +         | +            | +        | +            | +        | +        | +        |
| H <sub>2</sub> S production | -                     | -         | -            | -        | -            | -        | -        | -        |
| Voges Proskauer             | -                     | -         | -            | +        | -            | -        | -        | -        |
| Urease activity             | +                     | +         | +            | -        | +            | +        | +        | -        |
| Indole production           | -                     | -         | -            | -        | -            | -        | -        | -        |
| Citrate utilization         | +                     | +         | +            | +        | +            | -        | -        | +        |
| Glucose                     | +                     | +         | +            | +        | +            | +        | +        | +        |
| Sucrose                     | +                     | +         | +            | +        | +            | +        | +        | +        |
| Xylose                      | +                     | +         | +            | -        | +            | +        | +        | +        |
| Lactose                     | +                     | +         | +            | -        | +            | +        | +        | +        |
| Starch                      | -                     | -         | -            | +        | -            | -        | -        | -        |
| Maltose                     | +                     | +         | -            | +        | -            | -        | -        | +        |
| Galactose                   | +                     | +         | -            | +        | -            | +        | +        | +        |
| Fructose                    | +                     | +         | +            | +        | +            | +        | +        | +        |
| Mannose                     | -                     | +         | -            | +        | -            | +        | -        | -        |
| Cellobiose                  | +                     | -         | -            | +        | -            | -        | -        | +        |
| Glycerol                    | +                     | +         | +            | +        | +            | +        | +        | +        |
| Mannitol                    | +                     | +         | +            | -        | +            | +        | +        | -        |

(+ Positive; - Negative)
